# Supplementary material for: Machine Learning Approach for Prescriptive Plant Breeding
Source: PubMed Central journal article supplement (PMC6868245; doi:10.1038/s41598-019-53451-4), 2019-11-20
Supplement: 41598_2019_53451_MOESM1_ESM.pdf [file 41598_2019_53451_MOESM1_ESM.pdf]

## Machine Learning Approach for Prescriptive Plant Breeding

Kyle A. Parmley<sup>1</sup>, Race H. Higgins<sup>1</sup>, Baskar Ganapathysubramanian<sup>2</sup>, Soumik Sarkar<sup>2</sup>, Asheesh K. Singh<sup>1\*</sup>

**Supplementary Table S1** Subset of SoyNAM genotypes evaluated across nine environments from 2014 to 2016.

| <b>Landrace (PI)</b> | <b>Diverse</b> | <b>High Yield (Elite)</b> |
|----------------------|----------------|---------------------------|
| PI 398881            | LG94-1128      | 4J105-3-4                 |
| PI 404188A           | LG00-3372      | 5M20-2-5-2                |
| PI 427136            | LG90-2550      | CL0J95-4-6                |
| PI 437169B           | LG98-1605      | CL0J173-6-8               |
| PI 507681B           | LG03-2979      | HS6-3976                  |
| PI 518751            | LG05-4832      | LD01-5907                 |
| PI 561370            | LG92-1255      | LD02-4485                 |
| PI 574486            | LG04-4717      | Maverick                  |
|                      | LG97-7012      | NE3001                    |
|                      | LG05-4464      | Prohio                    |
|                      |                | Skylla                    |
|                      |                | U03-100612                |

**Supplementary Table S2** GPS coordinates and observed environmental conditions of testing environments where 32 genotypes of the SoyNAM diversity panel were phenotyped and seed yield measured in contrasting agro-management systems.

| Experiment | Year | Environment<br>(County) | GPS Coordinates       | Environmental Conditions |                       |                               |                                          |                                     |
|------------|------|-------------------------|-----------------------|--------------------------|-----------------------|-------------------------------|------------------------------------------|-------------------------------------|
|            |      |                         |                       | Mean Min<br>Temp (°C)    | Mean Max<br>Temp (°C) | Mean Relative<br>Humidity (%) | Cumulative<br>Solar<br>Radiation<br>(MJ) | Cumulative<br>Precipitation<br>(in) |
| IA-RS      | 2015 | 1 (Boone)               | 42.018773, -93.771428 | 59                       | 78                    | 81                            | 2910                                     | 29                                  |
|            |      | 2 (Story)               | 42.011277, -93.733884 | 59                       | 78                    | 81                            | 2910                                     | 29                                  |
|            | 2016 | 3 (Boone)               | 42.009966, -93.788575 | 60                       | 80                    | 78                            | 3051                                     | 25                                  |
|            |      | 4 (Boone)               | 42.014145, -93.787124 | 60                       | 80                    | 78                            | 3051                                     | 25                                  |
|            |      | 5 (Cass)                | 41.330982, -95.183034 | 59                       | 81                    | 79                            | 2852                                     | 26                                  |
| IA-SD      | 2014 | 1 (Story)               | 41.998856, -93.696969 | 58                       | 78                    | 79                            | 2877                                     | 26                                  |
|            |      | 2 (Story)               | 42.010934, -93.731847 | 59                       | 78                    | 81                            | 2910                                     | 29                                  |
|            | 2015 | 3 (Boone)               | 42.013878, -93.787441 | 59                       | 78                    | 81                            | 2910                                     | 29                                  |
|            |      | 4 (Warren)              | 41.350007, -93.404313 | 59                       | 80                    | 83                            | 2913                                     | 28                                  |

**Note:** Environmental conditions were collected and compiled from the Iowa State University Soil Moisture Network (<https://mesonet.agron.iastate.edu/agclimate/#tmpf>). Presented data are from May 1 – September 30 for each year and the nearest monitoring station used to the testing location.

**Supplementary Table S3** Vegetative indices computed from hyperspectral reflectance wavelengths in the experiment (IA-RS and IA-SD).

| <b>Name</b>                              | <b>Index</b> | <b>Equation<sup>a</sup></b>                                                               | <b>Original Source</b>  |
|------------------------------------------|--------------|-------------------------------------------------------------------------------------------|-------------------------|
| Photochemical Reflectance Index          | PRI          | $(\rho_{531} - \rho_{570}) / (\rho_{531} + \rho_{570})$                                   | Peñuelas et al., 1995   |
| Ratio Analysis of Reflectance Spectra A  | RARSa        | $(\rho_{675} / \rho_{700})$                                                               | Chappelle et al., 1992  |
| Ratio Analysis of Reflectance Spectra B  | RARSb        | $(\rho_{675} / (\rho_{650} \times \rho_{700}))$                                           | Chappelle et al., 1992  |
| Plant Senescence Reflectance Index       | PSRI         | $(\rho_{680} - \rho_{500}) / \rho_{750}$                                                  | Merzlyak et al., 1999   |
| Vogelmann's Red Edge Index 2             | VREI2        | $(\rho_{734} - \rho_{747}) / (\rho_{715} + \rho_{726})$                                   | Vogelmann et al., 1993  |
| Normalized Difference Vegetation Index   | NDVI         | $(\rho_{780} - \rho_{670}) / (\rho_{780} + \rho_{670})$                                   | Rouse, 1973             |
| Renormalized Difference Vegetation Index | RDVI         | $(\rho_{800} - \rho_{670}) / \text{Sqrt}(\rho_{800} - \rho_{670})$                        | Roujean and Breon, 1995 |
| Normalized Multi-band Drought Index      | NMDI         | $(\rho_{860} - (\rho_{1640} - \rho_{2130})) / (\rho_{860} + (\rho_{1640} + \rho_{2130}))$ | Wang and Qu, 2007       |

<sup>a</sup>  $\rho$  is reflectance and the subscript is wavelength (nm).

**Supplementary Table S4** ANOVA table for fixed effects in both experiments (IA-RS and IA-SD).

| <b>Source of Variation</b> | <b>IA-RS</b>                          |           | <b>IA-SD</b>                          |           |
|----------------------------|---------------------------------------|-----------|---------------------------------------|-----------|
|                            | <b>F value and significance level</b> | <b>df</b> | <b>F value and significance level</b> | <b>df</b> |
| Location (l)               | 119**                                 | 4         | 273**                                 | 3         |
| Genotype (g)               | 7.4**                                 | 31        | 23.2**                                | 31        |
| Genotype x Location (gl)   | 1.8**                                 | 124       | 1.8**                                 | 93        |
| Management Treatment (t)   | 8.0*                                  | 1         | 36.9**                                | 2         |
| Management x Genotype (gt) | 1.1                                   | 31        | <1                                    | 62        |

\* Significant at the 0.05 level

\*\* Significant at the 0.01 level

**Supplementary Table S5** Descriptive statistics of seed yield (kg ha<sup>-1</sup>) for agro-management systems experiments (IA-RS and IA-SD).

| Experiment | Treatment | Seed Yield (kg ha <sup>-1</sup> ) |        |          |        |        |                                 |
|------------|-----------|-----------------------------------|--------|----------|--------|--------|---------------------------------|
|            |           | N                                 | Mean   | Std. Dev | Min    | Max    | Repeatability (H <sup>2</sup> ) |
| IA-RS      | 38        | 465                               | 3203.6 | 595.8    | 1713.6 | 4883.5 | 0.95                            |
|            | 76        | 474                               | 3146.8 | 570.7    | 1726.2 | 4927.4 | 0.96                            |
| IA-SD      | Low       | 377                               | 2886.6 | 800.1    | 878.8  | 4645.0 | 0.78                            |
|            | Med       | 378                               | 3226.9 | 772.5    | 1048.3 | 5235.0 | 0.78                            |
|            | High      | 378                               | 3215.8 | 801.9    | 1010.6 | 5542.6 | 0.81                            |

**Supplementary Table S6** Description of physiological traits included in random forest using ‘sizeTolerance’ function in ‘caret’ R package to identify informative subset of predictor variables.

| <b>Combined</b> | <b>IA-RS</b> |             | <b>IA-SD</b> |            |             |
|-----------------|--------------|-------------|--------------|------------|-------------|
| <b>All</b>      | <b>38cm</b>  | <b>76cm</b> | <b>Low</b>   | <b>Med</b> | <b>High</b> |
| SPAD_S1         | LAI_S2       | SPAD_S3     | CT_S3        | SPAD_S3    | CT_S3       |
| SPAD_S2         | SPAD_S1      | VI_S1_RARSa | iPAR_S1      | VI_S2_PRI  | SPAD_S3     |
| SPAD_S3         | VI_S2_RARSa  | VI_S2_VREI2 | VI_S2_VREI2  | VI_S3_PRI  | VI_S2_PRI   |
| VI_S2_VREI2     | VI_S3_NMDI   | VI_S3_NMDI  | VI_S3_NDVI   |            | VI_S2_VREI2 |
| VI_S3_VREI2     | VI_S3_PRI    | VI_S3_VREI2 | VI_S3_PRI    |            | VI_S3_NDVI  |
| VI_S3_NDVI      | VI_S3_RARSb  |             | VI_S3_PSRI   |            | VI_S3_PRI   |
| VI_S3_NMDI      | VI_S3_VREI2  |             | VI_S3_VREI2  |            | VI_S3_VREI2 |
| VI_S3_RARSb     |              |             |              |            |             |

**Supplementary Table S7** Results of recursive feature elimination random forest models trained using only a subset of the predictor traits that optimized model performance. Additional models were trained using a reduced subset using the ‘sizeTolerance’ function to further decrease the number of predictor variables included without increasing OOB RMSE more than 5% when compared to model with optimal performance.

| Experiment | Treatment | # Features <sup>a</sup> | OOB Train Performance |                | Test Performance |      | Ranking Performance |      |      |
|------------|-----------|-------------------------|-----------------------|----------------|------------------|------|---------------------|------|------|
|            |           |                         | RMSE                  | R <sup>2</sup> | R <sup>2</sup>   | RMSE | BACC                | SEN  | SPE  |
| Combined   | All       | 30/8                    | 299/319               | 0.68/0.63      | 0.63             | 244  | 0.79                | 0.67 | 0.92 |
| IA-RS      | 38cm      | 25/7                    | 324/346               | 0.58/0.53      | 0.44             | 243  | 0.77                | 0.63 | 0.91 |
|            | 76cm      | 15/5                    | 339/358               | 0.48/0.44      | 0.40             | 247  | 0.72                | 0.55 | 0.95 |
| IA-SD      | Low       | 13/7                    | 232/241               | 0.82/0.80      | 0.80             | 205  | 0.88                | 0.81 | 0.95 |
|            | Med       | 25/3                    | 313/331               | 0.69/0.64      | 0.66             | 253  | 0.77                | 0.63 | 0.91 |
|            | High      | 32/7                    | 293/307               | 0.69/0.67      | 0.60             | 228  | 0.84                | 0.75 | 0.94 |

<sup>a</sup>Number of predictor variables included in model with; lowest RMSE value/ 5% range of lowest RMSE.

## Supplementary Figures

|           |         | Observed            |                     |
|-----------|---------|---------------------|---------------------|
|           |         | Select              | Discard             |
| Predicted | Select  | True Positive (TP)  | False Positive (FP) |
|           | Discard | False Negative (FN) | True Negative (TN)  |

$$\text{Balanced Accuracy (BACC)} = \frac{SEN + SPE}{2}$$

$$\text{Sensitivity (SEN)} = \frac{TP}{TP + FN}$$

$$\text{Specificity (SPE)} = \frac{TN}{TN + FP}$$

**Supplementary Figure S1** Confusion matrix and classification performance metrics to assess RF classifier performance.



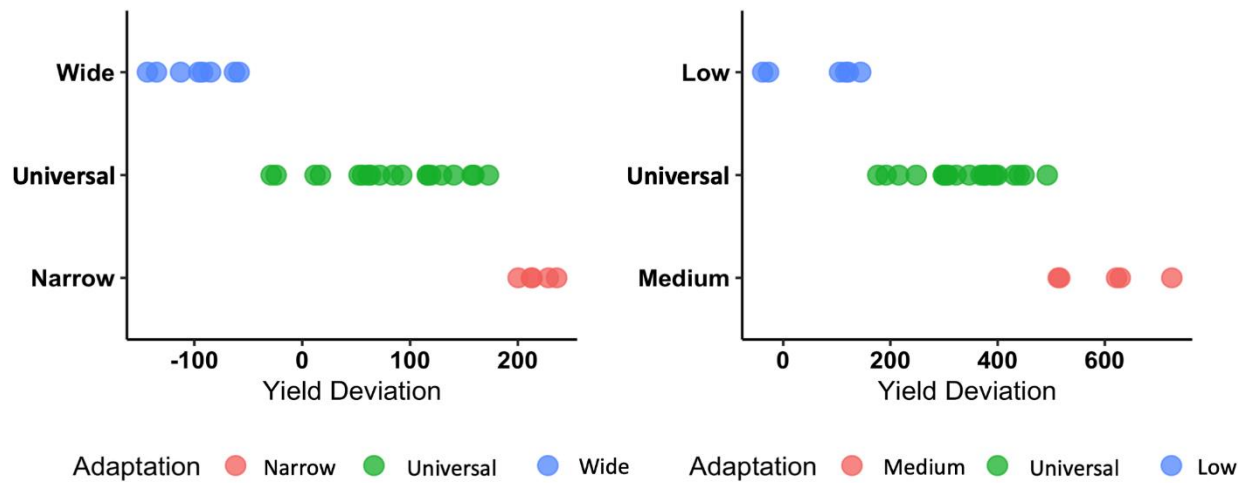

**Supplementary Figure S2** Genotype adaptation classes assessed by computing yield deviation for IA-RS study (left) and IA-SD study (right) contrasting treatment levels.

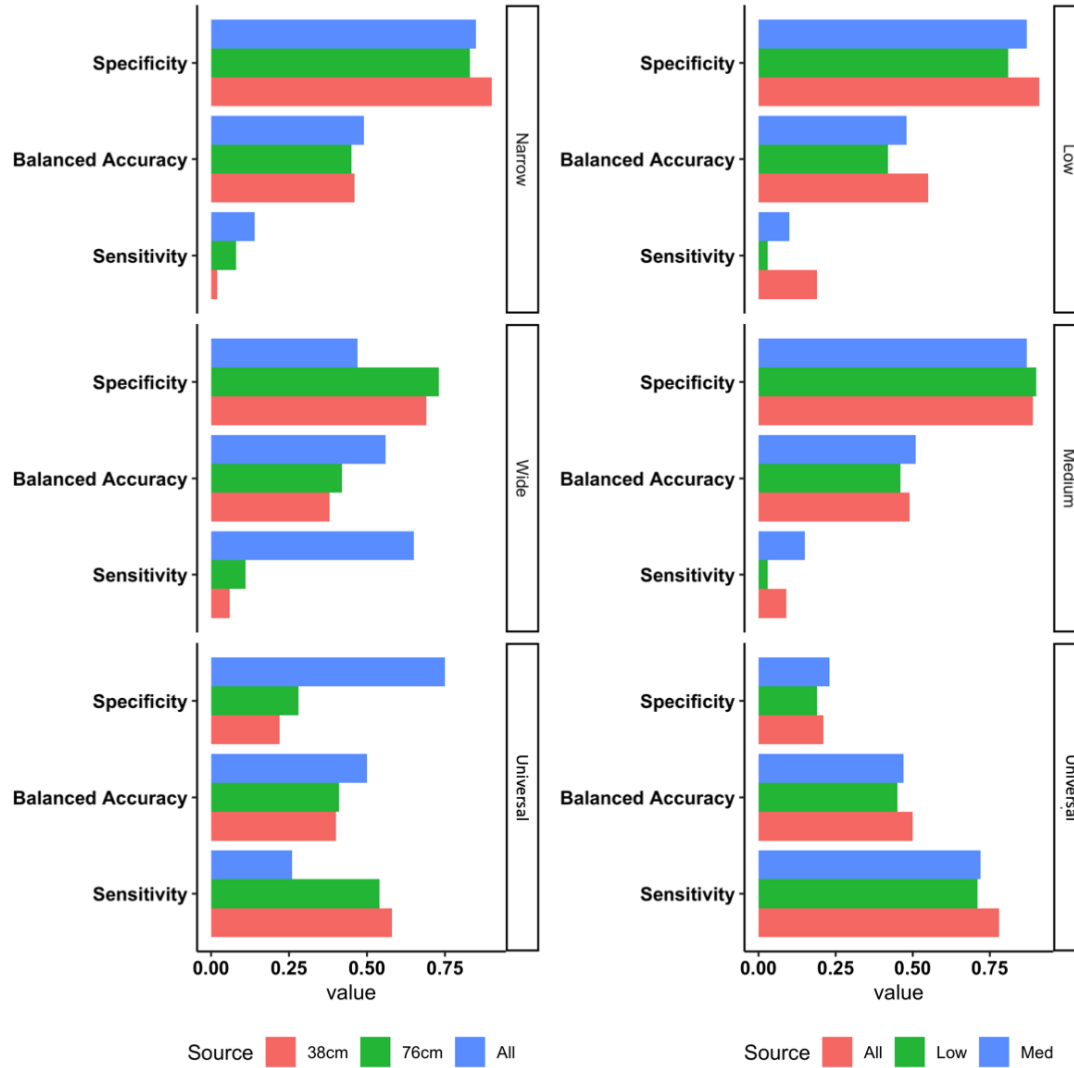

**Supplementary Figure S3** Random Forest classifier performance of predicting genotype management fit conditional on the agro-management treatment levels from where training data were used.

**List of abbreviations**

| <b>Abbreviation</b> | <b>Definition</b>                               |
|---------------------|-------------------------------------------------|
| BACC                | Balanced Accuracy                               |
| BLUP                | Best Linear Unbiased Predictor                  |
| CT                  | Canopy Temperature                              |
| FN                  | False Negative                                  |
| FP                  | False Positive                                  |
| HTP                 | High Throughput Phenotyping                     |
| iPAR                | Intercepted Photosynthetically Active Radiation |
| LAI                 | Leaf Area Index                                 |
| ML                  | Machine Learning                                |
| MTA                 | Mean Tilt Angle                                 |
| OOB                 | Out-of-bag error                                |
| PRE                 | Precision                                       |
| R <sup>2</sup>      | Coefficient of determination                    |
| RF                  | Random Forest                                   |
| RFE                 | Recursive Feature Elimination                   |
| RMSE                | Root Mean Square Error                          |
| SEN                 | Sensitivity                                     |
| SoyNAM              | Soybean Nested Association Mapping              |
| SPAD                | Leaf chlorophyll content                        |
| SPE                 | Specificity                                     |
| SY                  | Seed Yield                                      |
| TN                  | True Negative                                   |
| TP                  | True Positive                                   |
| VI                  | Vegetative Indices                              |
